# Supplementary material for: Frequencies of polymorphisms associated with BSE resistance differ significantly between Bos taurus, Bos indicus, and composite cattle
Source: PubMed Central journal article supplement (PMC2569919; doi:10.1186/1746-6148-4-36), 2008-09-22
Supplement: 1746-6148-4-36-S2.pdf [file 1746-6148-4-36-S2.pdf]

**Additional Table 2 - Genotype frequencies for the 23-bp and 12-bp insertion/deletion polymorphism for each breed**

The 23-bp and 12-bp homozygous insertion (+/+), heterozygous (+/-), and homozygous deletion (-/-) genotype frequencies for each breed of *B. indicus*, *B. taurus*, and *B. indicus* x *B. taurus* composite cattle.

|                                             | 23 bp |      |      |      | 12 bp |      |      |      |
|---------------------------------------------|-------|------|------|------|-------|------|------|------|
|                                             | n     | +/+  | +/-  | -/-  | n     | +/+  | +/-  | -/-  |
| <b>B. indicus</b>                           |       |      |      |      |       |      |      |      |
| Brahman <sup>a,b</sup>                      | 30    | 0.03 | 0.30 | 0.67 | 30    | 0.90 | 0.10 | 0.00 |
| Nelore <sup>a,b</sup>                       | 14    | 0.00 | 0.00 | 1.00 | 14    | 0.86 | 0.14 | 0.00 |
| Gir <sup>a</sup>                            | 12    | 0.00 | 0.25 | 0.75 | 12    | 0.33 | 0.58 | 0.08 |
| Guzerat <sup>a</sup>                        | 1     | 0.00 | 0.00 | 1.00 | 1     | 0.00 | 1.00 | 0.00 |
| Tabapua <sup>a</sup>                        | 1     | 0.00 | 0.00 | 1.00 | 1     | 1.00 | 0.00 | 0.00 |
| Total B. indicus                            | 58    | 0.02 | 0.21 | 0.78 | 58    | 0.76 | 0.22 | 0.02 |
| <b>Crossbred</b>                            |       |      |      |      |       |      |      |      |
| Santa Gertrudis <sup>a,b</sup>              | 9     | 0.00 | 0.33 | 0.67 | 9     | 0.00 | 0.67 | 0.33 |
| Brangus <sup>a,b</sup>                      | 16    | 0.00 | 0.38 | 0.63 | 16    | 0.25 | 0.63 | 0.13 |
| Beefmaster <sup>b</sup>                     | 4     | 0.00 | 0.00 | 1.00 | 4     | 0.00 | 0.50 | 0.50 |
| Braford <sup>b</sup>                        | 4     | 0.00 | 0.25 | 0.75 | 4     | 0.00 | 0.50 | 0.50 |
| Bramousin <sup>b</sup>                      | 2     | 0.50 | 0.50 | 0.00 | 2     | 0.50 | 0.50 | 0.00 |
| Simbrah <sup>b</sup>                        | 3     | 0.00 | 0.67 | 0.33 | 3     | 0.67 | 0.33 | 0.00 |
| Total Crossbred                             | 38    | 0.03 | 0.34 | 0.63 | 38    | 0.18 | 0.58 | 0.24 |
| <b>B. taurus</b>                            |       |      |      |      |       |      |      |      |
| Shorthorn <sup>a,b</sup>                    | 19    | 0.00 | 0.16 | 0.84 | 19    | 0.00 | 0.16 | 0.84 |
| US Holstein <sup>c</sup>                    | 690   | 0.18 | 0.51 | 0.31 | 690   | 0.23 | 0.50 | 0.28 |
| UK Holstein <sup>d</sup>                    | 276   | 0.05 | 0.49 | 0.46 | 270   | 0.11 | 0.52 | 0.37 |
| German Holstein <sup>e</sup>                | 80    | 0.09 | 0.49 | 0.43 | 80    | 0.11 | 0.55 | 0.34 |
| German Fleckvieh <sup>e</sup>               | 60    | 0.12 | 0.38 | 0.50 | 60    | 0.22 | 0.32 | 0.47 |
| German Brown <sup>e</sup>                   | 41    | 0.27 | 0.59 | 0.15 | 41    | 0.68 | 0.32 | 0.00 |
| Swiss Brown <sup>e</sup>                    | 103   | 0.41 | 0.41 | 0.18 | 103   | 0.57 | 0.40 | 0.03 |
| Swiss Scharzfleck <sup>e</sup>              | 26    | 0.23 | 0.58 | 0.19 | 26    | 0.31 | 0.54 | 0.15 |
| Swiss Simmental x Red Holstein <sup>e</sup> | 121   | 0.21 | 0.48 | 0.31 | 121   | 0.31 | 0.45 | 0.25 |
| Japanese Holstein <sup>f</sup>              | 278   | 0.05 | 0.32 | 0.63 | 290   | 0.07 | 0.38 | 0.55 |
| Japanese Black <sup>f</sup>                 | 186   | 0.10 | 0.61 | 0.28 | 186   | 0.13 | 0.61 | 0.26 |
| Polish Holstein <sup>g</sup>                | 281   | 0.12 | 0.50 | 0.38 | 281   | 0.20 | 0.51 | 0.28 |
| Korean Holstein <sup>h</sup>                | 52    | 0.12 | 0.37 | 0.52 | 52    | 0.20 | 0.41 | 0.39 |
| Other <sup>b,i</sup>                        | 63    | 0.12 | 0.44 | 0.44 | 63    | 0.21 | 0.42 | 0.36 |
| Total B. taurus                             | 2276  | 0.14 | 0.48 | 0.39 | 2282  | 0.20 | 0.48 | 0.32 |

<sup>a</sup>This study, <sup>b</sup>Seabury et al., 2004a,b, <sup>c</sup>Brunelle et al., 2007, <sup>d</sup>Juling et al., 2006, <sup>e</sup>Haase et al., 2007, <sup>f</sup>Nakamitsu et al., 2006, <sup>g</sup>Czarnik et al., 2007, <sup>h</sup>Jeong et al., 2006, <sup>i</sup>Combination of 20 *B. taurus* breeds (see Methods for details)
