# Supplementary material for: Frequencies of polymorphisms associated with BSE resistance differ significantly between Bos taurus, Bos indicus, and composite cattle
Source: PubMed Central journal article supplement (PMC2569919; doi:10.1186/1746-6148-4-36), 2008-09-22
Supplement: 1746-6148-4-36-S3.pdf [file 1746-6148-4-36-S3.pdf]

**Additional Table 3 - Haplotype frequencies for the 23-bp and 12-bp insertion/deletion polymorphism for each breed**

The 23-bp insertion-12-bp insertion (++), 23-bp deletion-12-bp insertion (-+), and 23-bp deletion-12-bp deletion (--) haplotype frequencies for each breed of *B. indicus*, *B. taurus*, and *B. indicus* x *B. taurus* composite cattle.

|                                             | n    | ++   | -+   | --   |
|---------------------------------------------|------|------|------|------|
| <b>B. indicus</b>                           |      |      |      |      |
| Brahman <sup>a,b</sup>                      | 60   | 0.18 | 0.77 | 0.05 |
| Nelore <sup>a,b</sup>                       | 28   | 0.00 | 0.93 | 0.07 |
| Gir <sup>a</sup>                            | 24   | 0.13 | 0.50 | 0.38 |
| Guzerat <sup>a</sup>                        | 2    | 0.00 | 0.50 | 0.50 |
| Tabapua <sup>a</sup>                        | 2    | 0.00 | 1.00 | 0.00 |
| Total B. indicus                            | 116  | 0.12 | 0.75 | 0.13 |
| <b>Crossbred</b>                            |      |      |      |      |
| Santa Gertrudis <sup>a,b</sup>              | 18   | 0.17 | 0.17 | 0.67 |
| Brangus <sup>a,b</sup>                      | 32   | 0.19 | 0.38 | 0.44 |
| Beefmaster <sup>b</sup>                     | 8    | 0.00 | 0.25 | 0.75 |
| Braford <sup>b</sup>                        | 8    | 0.13 | 0.13 | 0.75 |
| Bramousin <sup>b</sup>                      | 4    | 0.75 | 0.00 | 0.25 |
| Simbrah <sup>b</sup>                        | 6    | 0.33 | 0.50 | 0.17 |
| Total Crossbred                             | 76   | 0.20 | 0.28 | 0.53 |
| <b>B. taurus</b>                            |      |      |      |      |
| Shorthorn <sup>a,b</sup>                    | 38   | 0.08 | 0.00 | 0.92 |
| US Holstein <sup>c</sup>                    | 1380 | 0.43 | 0.04 | 0.52 |
| UK Holstein <sup>d</sup>                    | 540  | 0.29 | 0.08 | 0.63 |
| German Holstein <sup>e</sup>                | 160  | 0.33 | 0.06 | 0.61 |
| German Fleckvieh <sup>e</sup>               | 120  | 0.31 | 0.07 | 0.63 |
| German Brown <sup>e</sup>                   | 82   | 0.56 | 0.28 | 0.16 |
| Swiss Brown <sup>e</sup>                    | 206  | 0.61 | 0.17 | 0.22 |
| Swiss Scharzfleck <sup>e</sup>              | 52   | 0.52 | 0.06 | 0.42 |
| Swiss Simmental x Red Holstein <sup>e</sup> | 242  | 0.45 | 0.08 | 0.47 |
| Polish Holstein <sup>f</sup>                | 281  | 0.35 | 0.11 | 0.52 |
| Korean Holstein <sup>g</sup>                | 104  | 0.30 | 0.09 | 0.62 |
| Other <sup>b,h</sup>                        | 126  | 0.34 | 0.08 | 0.58 |
| Total B. taurus                             | 3604 | 0.40 | 0.08 | 0.53 |

<sup>a</sup>This study, <sup>b</sup>Seabury et al., 2004a,b, <sup>c</sup>Brunelle et al., 2007, <sup>d</sup>Juling et al., 2006, <sup>e</sup>Haase et al., 2007, <sup>f</sup>Czarnik et al., 2007, <sup>g</sup>Jeong et al., 2006, <sup>h</sup>Combination of 20 *B. taurus* breeds (see Methods for details)
